# Supplementary material for: Modulation of cellular redox status by thiamine-activated NADPH oxidase confers Arabidopsis resistance to Sclerotinia sclerotiorum
Source: Oxford University Press journal article supplement (doi:10.1093/jxb/ert166), 2013-06-27
Supplement: ert166_Supplementary_Data.zip [file ert166_Supplementary_Data.zip]

Archive with 1 entries (1 files):
- jexbot099556_file001.pdf
