# Supplementary material for: Modulation of cellular redox status by thiamine-activated NADPH oxidase confers Arabidopsis resistance to Sclerotinia sclerotiorum
Source: Oxford University Press journal article supplement (doi:10.1093/jxb/ert166), 2013-06-27
Supplement: ert166_Supplementary_Data.zip [file ert166_Supplementary_Data.zip › jexbot099556_file001.pdf]

## Supplementary Material

### Modulation of Cellular Redox Status by Thiamine-activated NADPH oxidase Confers *Arabidopsis* Resistance to *Sclerotinia sclerotiorum*

Jun Zhou, Aizhen Sun, Da Xing\*

#### Supplementary Figure Legends

**Figure S1.** Thiamine does not affect the growth of *Sclerotinia* *in vitro*. The effect of thiamine on the phenotype (A) and the growth rate (B) of *Sclerotinia*. Mycelia were cultured for 5 days on potato-dextrose agar plates with 1 mM thiamine. Mycelia diameters of *Sclerotinia* were determined with a caliper on a daily basis for up to 2 days. (C) Oxalate concentration in leaves infected with wild-type or A2 mutant *Sclerotinia*. Leaves of *Arabidopsis* were inoculated and incubated for 1.5 d with agar plugs containing wild-type (WT) or oxalate-deficient mutant (A2) *Sclerotinia*. Control was mock inoculated agar plugs without containing *Sclerotinia* mycelia.

**Figure S2.** Thiamine and its derivatives contents in auxotroph *tz-1* *Arabidopsis*. (A) A small scheme showing the different steps in thiamine biosynthesis. (B) *tz-1* plants had low levels of thiamine compared with Col-0. The *tz-1* plants were grown in soil with thiamine under controlled concentrations (0.01%) for 4 weeks. (C) The levels of thiamine in *tz-1* plants were positive correlation with the culture's concentration. The *tz-1* plants were grown in soil contains 50 to 300  $\mu$ M thiamine after germination on agar medium weekly with 0.01% thiamine. Data are means  $\pm$ SD of three independent experiments with similar results. Asterisks (\*) indicate a significant difference from the Col-0 plant at  $P < 0.05$  (student's *t* test); (\*\*), student's *t* test significant at  $P < 0.01$ .

**Figure S3.** *In situ* detection of  $O_2^-$  formation at 2 days after *Sclerotinia* inoculation. (A)  $O_2^-$  accumulated surrounding the advancing edge of necrotic lesions. (B) The effect of thiamine on  $O_2^-$  generation in NOX mutants. The leaves of Col-0, *atrbohD* and *atrbohDF* were pretreated with thiamine prior to inoculation with wild-type *Sclerotinia*. Experiments were repeated at least three times, and a single typical experiment was shown.

**Figure S4.** Thiamine induced lignin accumulation in wild-type *Sclerotinia*-infected leaves. (A) Thiamine pretreatment induced lignin accumulation in leaves inoculated with wild-type *Sclerotinia*. Lignin was stained with phloroglucinol. Blue arrows indicate mycelium of

*Sclerotinia*. (B) Lignin content was measured the absorbance at 280 nm. Different letters indicate significant ( $P < 0.05$ ) among treatments according to Duncan's Multiple Range Test.

**Figure S5.** The effect of thiamine on  $H_2O_2$  generation in leaves inoculated with A2 mutant. Leaves were inoculated with A2 mutant at 4 h after spraying with  $250 \mu\text{g mL}^{-1}$  Tween 80 (control) or 1 mM thiamine dissolved in  $250 \mu\text{g mL}^{-1}$  Tween 80. The content of  $H_2O_2$  was measured 3 h later. Values represent means  $\pm$ SD of three independent experiments. Letters a, b and c indicate significant differences ( $P < 0.05$ ) among treatments according to Duncan's Multiple Range Test.

**Figure S6.** The effect of thiamine in cultivars of susceptible *B. napus* 'Yinong 34' and partially resistant 'Zhongshuang 9'. (A) Disease symptoms in *B. napus* 'Yinong 34' and 'Zhongshuang 9' after 36 h inoculated with *Sclerotinia*. (B) Statistical analysis of the lesion size in *B. napus* 'Yinong 34' and 'Zhongshuang 9'. Leaves of both varieties were infected with *Sclerotinia* grown on PDA and kept in a clear plastic box under saturating humidity at 20-22 °C. (C) Thiamine increased NOX activity in *B. napus* leaves challenged with wild-type *Sclerotinia* for 3 h. (D) Quantitative determination of  $H_2O_2$  in cultivars 'Yinong 34' and 'Zhongshuang 9'. (E) Tissue defence responses induced by thiamine in *B. napus* 'Zhongshuang 9'. Letters a, b and c indicate significant differences ( $P < 0.05$ ) among treatments according to Duncan's Multiple Range Test.

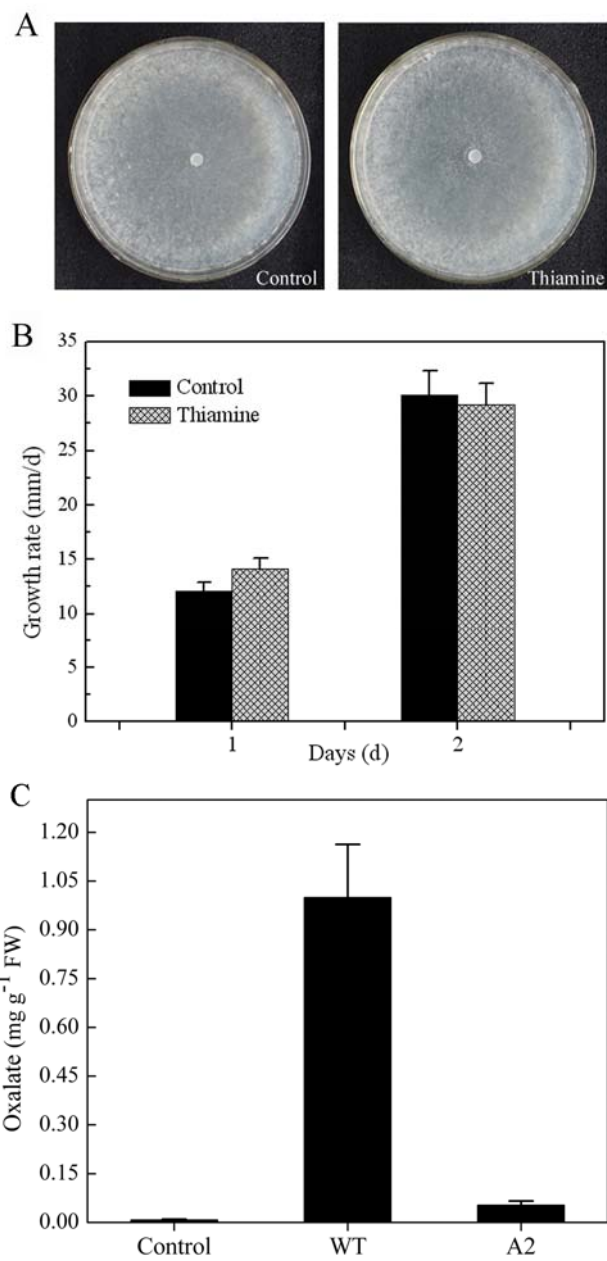

Figure S1

A

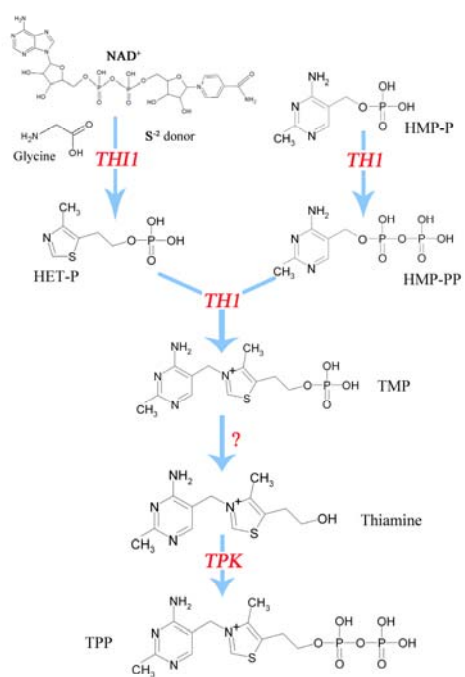

B

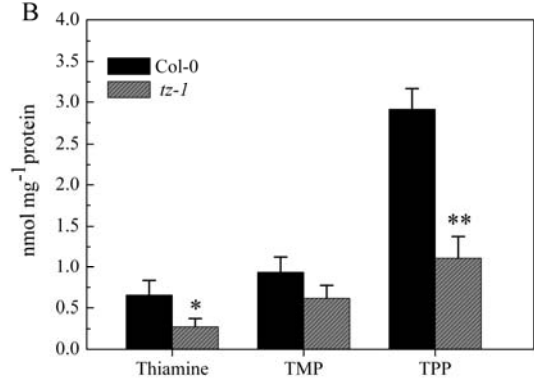

C

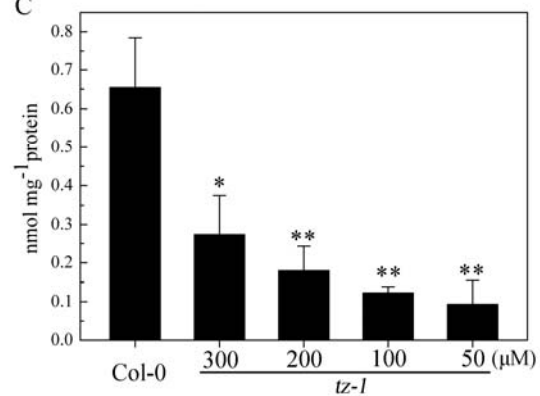

Figure S2

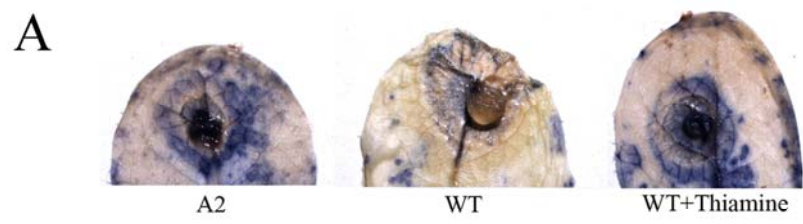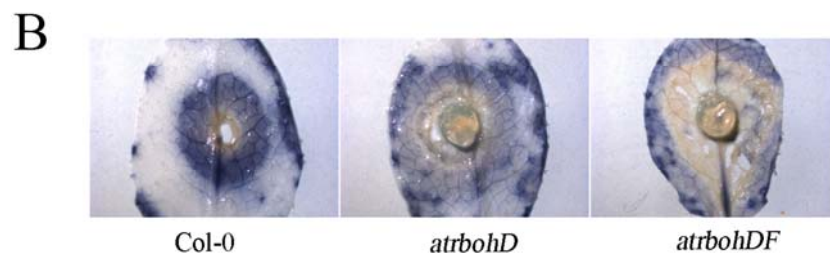

Figure S3

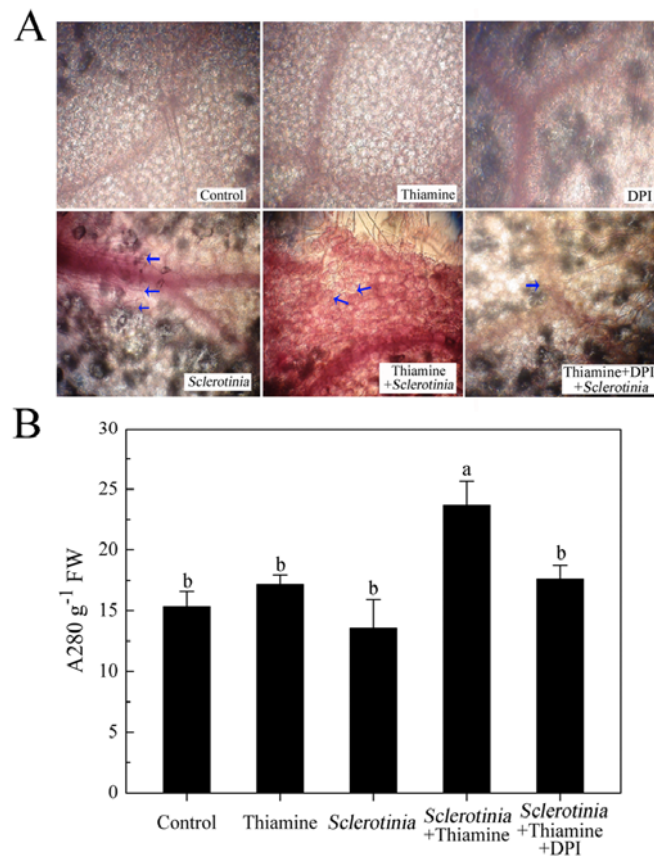

Figure S4

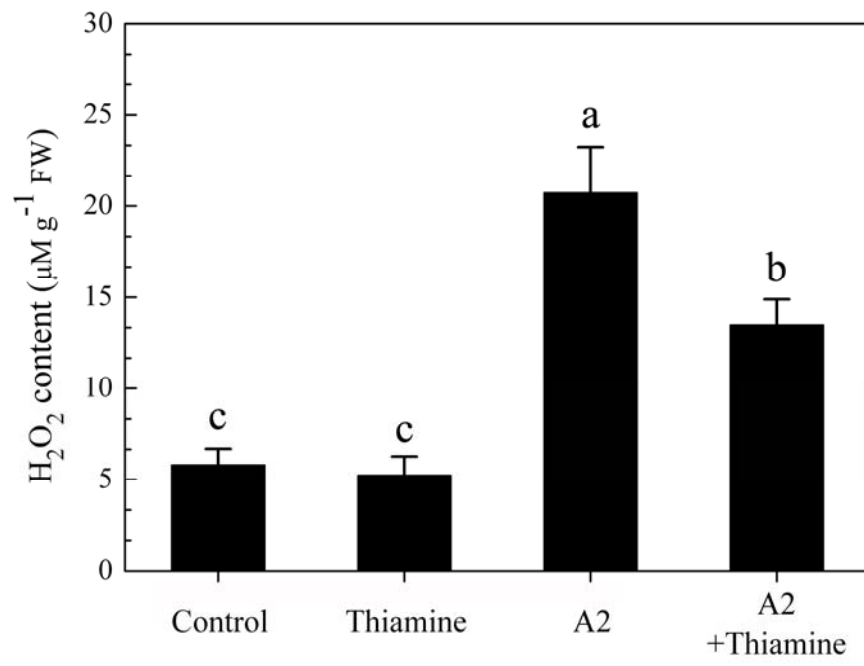

Figure S5

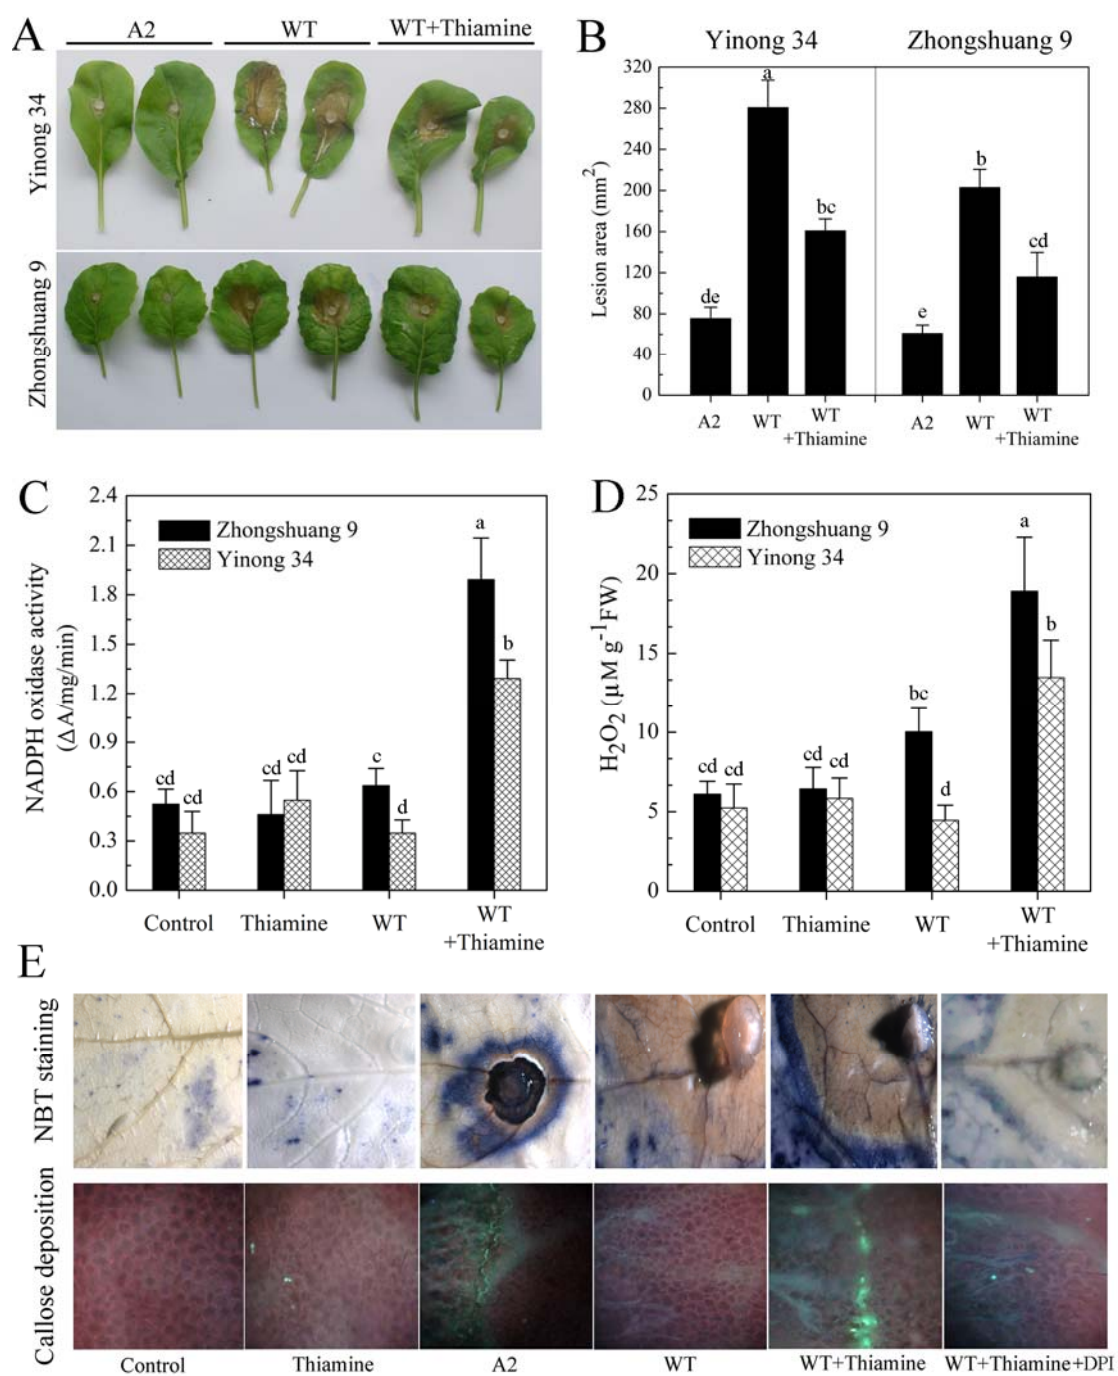

Figure S6
